# Supplementary material for: Equipment-free determination of ascorbic acid based on the UV-induced oxidation of 3,3′,5,5′-tetramethylbenzidine in a paper-based analysis device
Source: Royal Society of Chemistry journal article supplement (doi:10.1039/d3nj02986g), 2023-01-01
Supplement: d3nj02986g1.pdf [file d3nj02986g1.pdf]

## Equipment-free determination of ascorbic acid based on the UV-induced oxidation of 3,3',5,5'-tetramethylbenzidine in paper-based analysis device

Xiaoxia Liu<sup>1,2#</sup>, Wenya Hou<sup>1#</sup>, Jinzhong Zhao<sup>1</sup>, Lili Zhang<sup>3</sup>, Anping Li<sup>3\*</sup>, Ruiyan Ma<sup>2\*</sup>,  
*1 Department of Basic Teaching, Shanxi Agricultural University, Jinzhong, 030801, China*  
*2 College of Plant Protection, Shanxi Agricultural University, Jinzhong 030801, China*  
*3 Shanxi Zhendong Pharmaceutical Co., Ltd, Changzhi, 047100, China*

Table S1. Comparison of AA detection between this work and reported methods.

| Materials                              | Linear range<br>( $\mu\text{M}$ ) | LOD<br>( $\mu\text{M}$ ) | detection method             | Ref.         |
|----------------------------------------|-----------------------------------|--------------------------|------------------------------|--------------|
| CuO nanowire                           | 20-100                            | 0.05                     | Electrochemical              | [8]          |
| Rhodamine B@MOF/ $\text{Fe}^{3+}$      | 1-25                              | 0.3                      | Fluorimetric                 | [10]         |
| Si-QDs/ $\text{MnO}_2$ nanosheets      | 1-80                              | 0.48                     | Fluorometric                 | [11]         |
| Au nanoclusters/TMB                    | 1-200                             | 0.15                     | Fluorometric                 | [12]         |
|                                        |                                   | 0.22                     | Colorimetric                 |              |
| Paper/silver nanoparticles             | 0-3500                            | 10.5                     | transmittance<br>colorimeter | [26]         |
| Paper/Iodine/starch                    | 14-5677                           | 14                       | Scanner (color)              | [27]         |
| CoOOH Nanoflakes/TMB                   | 0.5-50                            | 0.14                     | Colorimetric                 | [31]         |
| M-CQDs/TMB                             | 10-70                             | 3.26                     | Colorimetric                 | [34]         |
| FeMnzyme/TMB                           | 8-56                              | 0.88                     | Colorimetric                 | [35]         |
| SiNP- $\text{MnO}_2$<br>nanocomposites | 1-400                             | 0.102                    | Fluorometric                 | [36]         |
| CA-CdTe QDs                            | 0.03-33                           | 0.011                    | Fluorometric                 | [37]         |
| Paper/TMB                              | 50-1000                           | 39                       | Smartphone (color)           | This<br>work |

MOF, metal-organic framework; QDs, quantum dots; CD, carbon quantum dots.
